# Supplementary material for: C5aR deficiency attenuates the breast cancer development via the p38/p21 axis
Source: Aging (Albany NY). 2020 Jul 15;12(14):14285–99. doi: 10.18632/aging.103468 (PMC7425439; doi:10.18632/aging.103468)
Supplement: Supplementary Figures [file aging-12-103468-s001..pdf]

## SUPPLEMENTARY FIGURES

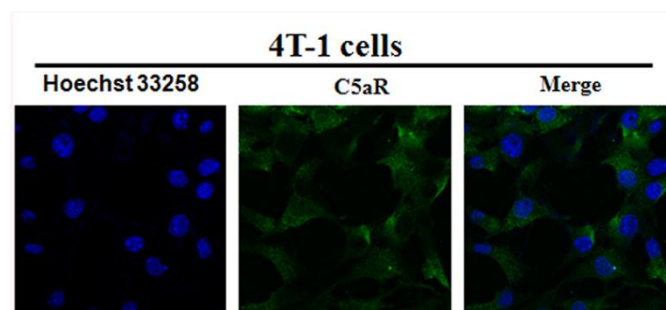

**Supplementary Figure 1. Expression of C5aR on 4T-1 cells.** The C5aR expression on 4T-1 cells was determined by confocal laser scanning microscopy. Nuclei were stained with Hoechst 33258 solution. Magnification: 400 $\times$ .

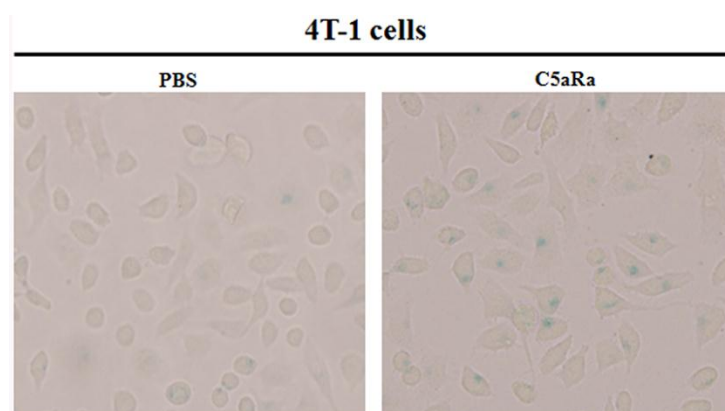

**Supplementary Figure 2. Increased aging of BC cells after treatment with C5aR antagonists.** 4T-1 cells were treated with C5aRa (10 nM) or PBS for 24 h. Senescence -associated  $\beta$ -galactosidase (Sen- $\beta$ -Gal) staining was performed using the Beyotime Biotechnology kit. Magnification: 400 $\times$ .

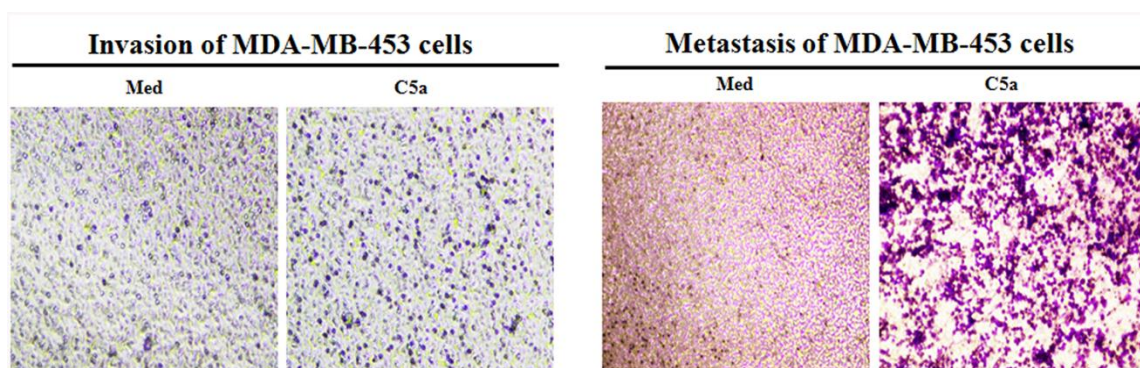

**Supplementary Figure 3. Increased cell invasion and metastasis of BC cells after exposure to C5a.** Non-adherent BC cell line MDA-MB-453 cells were treated with recombinant C5a (480 ng/mL) for 12 h and cells migration and invasion were assayed. Magnification: 200 $\times$ .

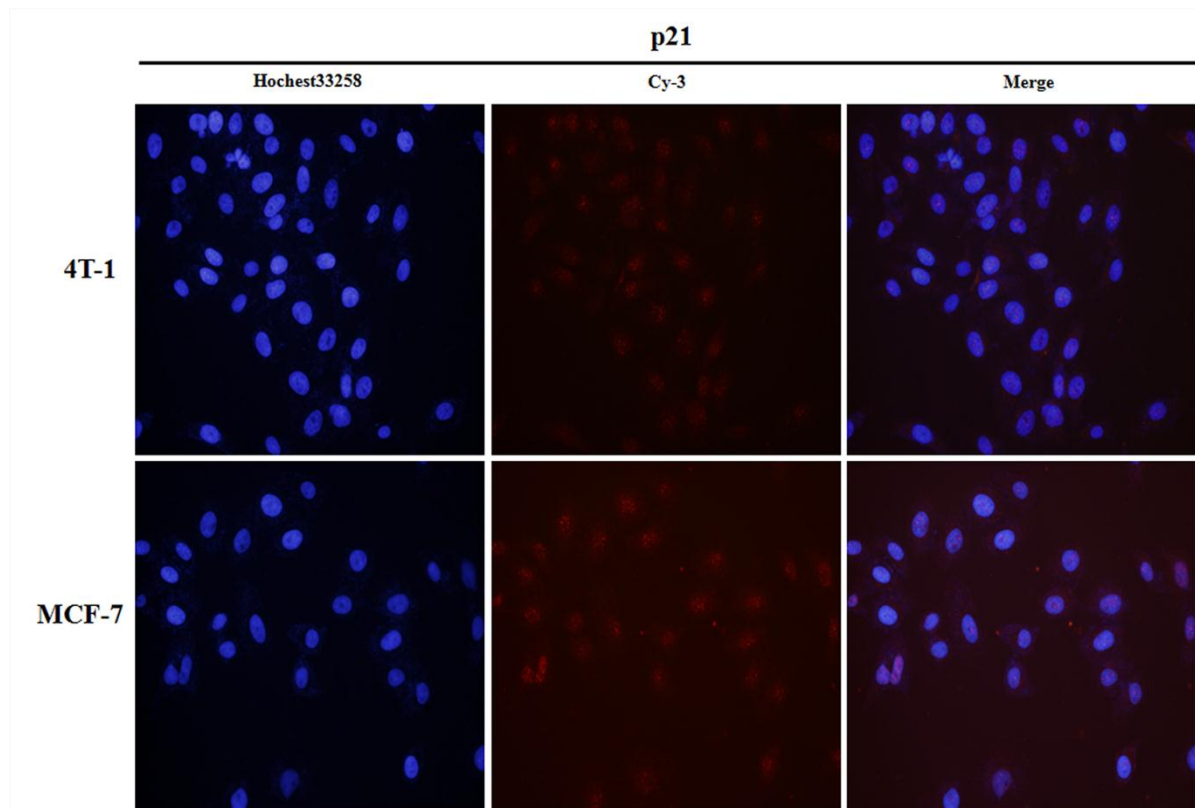

**Supplementary Figure 4. Expression of p21 on 4T-1 and MCF-7 cells.** The p21 expression was determined by confocal laser scanning microscopy. Nuclei were stained with Hoechst 33258 solution. Magnification: 400 $\times$ .

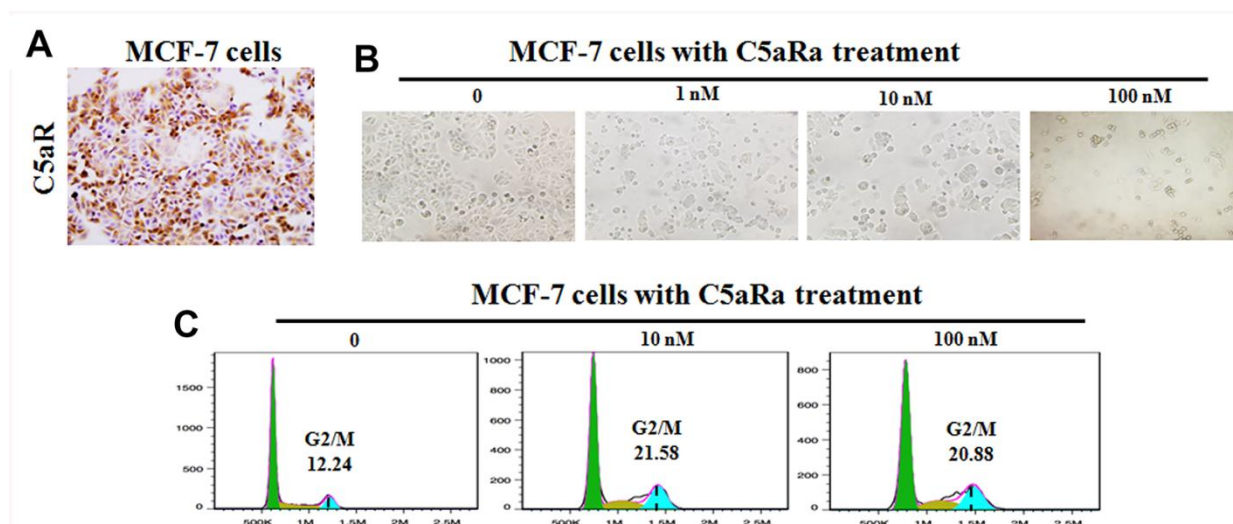

**Supplementary Figure 5. C5aRa treatment down-regulates the proliferation of BC cell line MCF-7 cells.** (A) Constitutive expression of C5aR. (B) Cells proliferation was showed and (C) Cells cycle distribution was assessed by flow cytometry after cells were incubated with 0, 1, 10, and 100 nM C5aRa for 24 h. Magnification: 200 $\times$ .
